# Supplementary material
Source: MDPI journal article supplement (https://www.mdpi.com/2073-4344/12/4/446)
Supplement: s1 [file s1]

## Supplementary Materials

# Sugarcane Bagasse Ash as a Catalyst Support for Facile and Highly Scalable Preparation of Magnetic Fenton Catalysts for Ultra-Highly Efficient Removal of Tetracycline

Natthanan Rattanachueskul <sup>1</sup>, Oraya Dokkathin <sup>1</sup>, Decha Dechtrirat <sup>2,3,4</sup>, Joongjai Panpranot <sup>5</sup>, Waralee Watcharin <sup>6</sup>, Sulawan Kaowphong <sup>7</sup> and Laemthong Chuenchom <sup>1,\*</sup>

**Citation:** Rattanachueskul, N.; Dokkathin, O.; Dechtrirat, D.; Panpranot, J.; Watcharin, W.; Kaowphong, S.; Chuenchom, L. Sugarcane Bagasse Ash as a Catalyst Support for Facile and Highly Scalable Preparation of Magnetic Fenton Catalysts for Ultra-Highly Efficient Removal of Tetracycline. *Catalysts* **2022**, *12*, 446. <https://doi.org/10.3390/catal12040446>

Academic Editors: Sagadevan Suresh and Is Fatimah

Received: 14 March 2022

Accepted: 14 April 2022

Published: 18 April 2022

**Publisher's Note:** MDPI stays neutral with regard to jurisdictional claims in published maps and institutional affiliations.

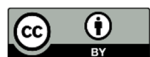

**Copyright:** © 2022 by the authors. Submitted for possible open access publication under the terms and conditions of the Creative Commons Attribution (CC BY) license (<https://creativecommons.org/licenses/by/4.0/>).

- <sup>1</sup> Division of Physical Science (Chemistry Program) and Center of Excellence for Innovation in Chemistry, Faculty of Science, Prince of Songkla University, Hat-Yai District, Songkhla 90110, Thailand; natthanan.rc@gmail.com (N.R.); orayamod.d@gmail.com (O.D.)
  - <sup>2</sup> Department of Materials Science, Faculty of Science, Kasetsart University, Bangkok 10900, Thailand; fscidcd@ku.ac.th
  - <sup>3</sup> Specialized Center of Rubber and Polymer Materials for Agriculture and Industry (RPM), Faculty of Science, Kasetsart University, Bangkok 10900, Thailand
  - <sup>4</sup> Laboratory of Organic Synthesis, Chulabhorn Research Institute, Bangkok 10210, Thailand
  - <sup>5</sup> Department of Chemical Engineering, Faculty of Engineering, Chulalongkorn University, Bangkok 10330, Thailand; joongjai.p@chula.ac.th
  - <sup>6</sup> Faculty of Biotechnology (Agro-Industry), Assumption University, Hua Mak Campus, Bangkok 10240, Thailand; waraleewtc0@gmail.com
  - <sup>7</sup> Department of Chemistry and Center of Excellence in Materials Science and Technology, Faculty of Science, Chiang Mai University, Chiang Mai 50200, Thailand; sulawank@gmail.com
- \* Correspondence: laemthong.c@psu.ac.th; Tel.: +66-74-288416; Fax: +66-74-558841

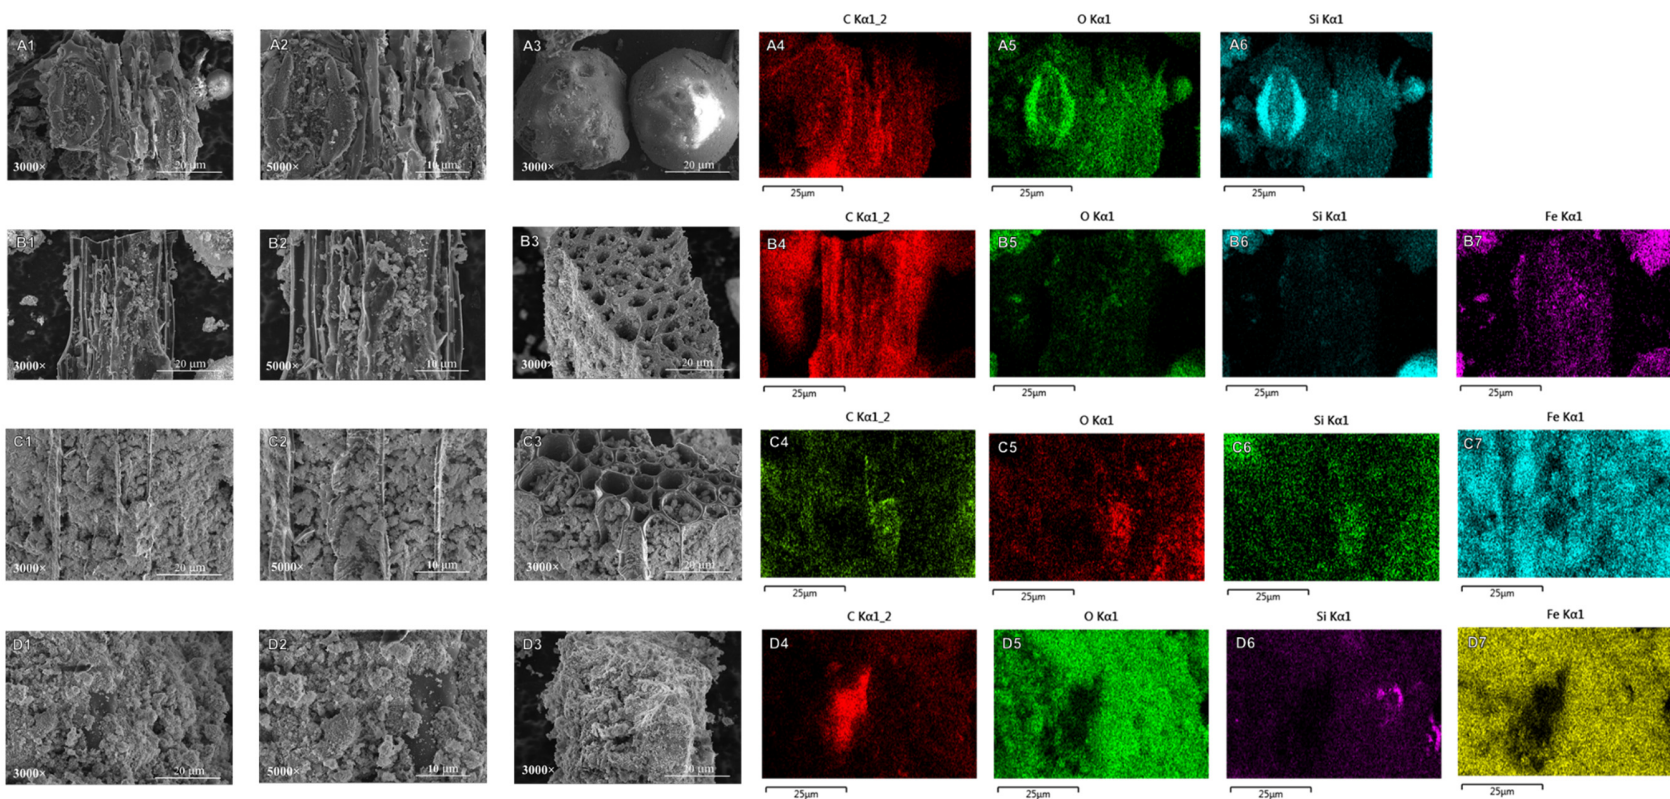

**Figure S1.** FESEM-EDX analysis. (A1-A3) FESEM images at 3000×-5000× of BGA, (A4-A6) Elemental mapping for C, O, and Si from (A1), (B1-B3) FESEM images at 3000×-5000× of MBGA2-1, (B4-B7) Elemental mapping for C, O, Si, and Fe from (B1), (C1-C3) FESEM images of MBGA2-1, (C4-C7) Elemental mapping for C, O, Si, and Fe from (C1), (D1-D3) FESEM images at 3000×-5000× MBGA2-2, and (D4-D7) Elemental mapping for C, O, Si, and Fe from (D1)

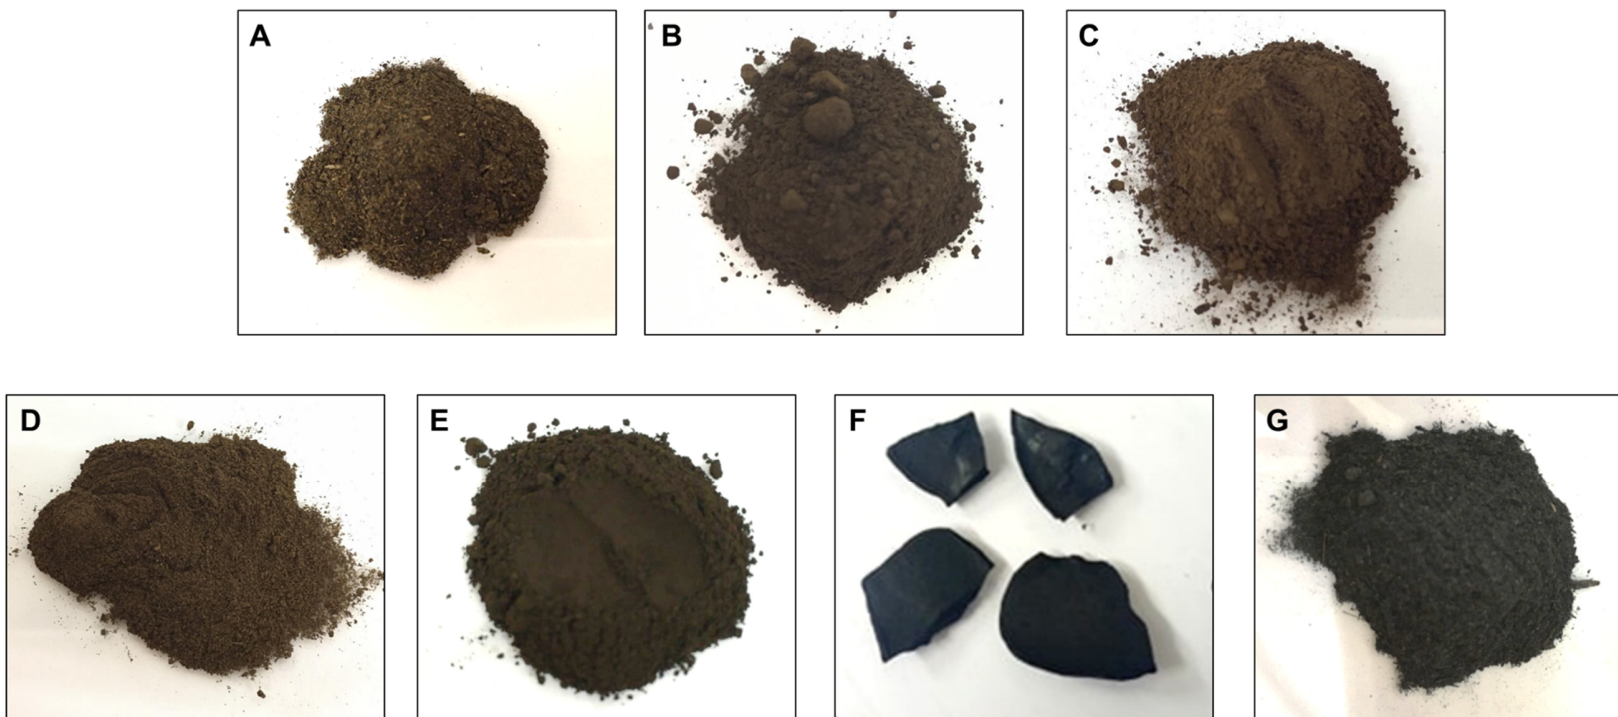

**Figure S2.** Physical images of A) MBGA1-1 b) MBGA2-1 C) MBGA5-1 D) MBGA2-0.5 E) MBGA2-2 F)  $\text{Fe}_3\text{O}_4$  and G) BGA

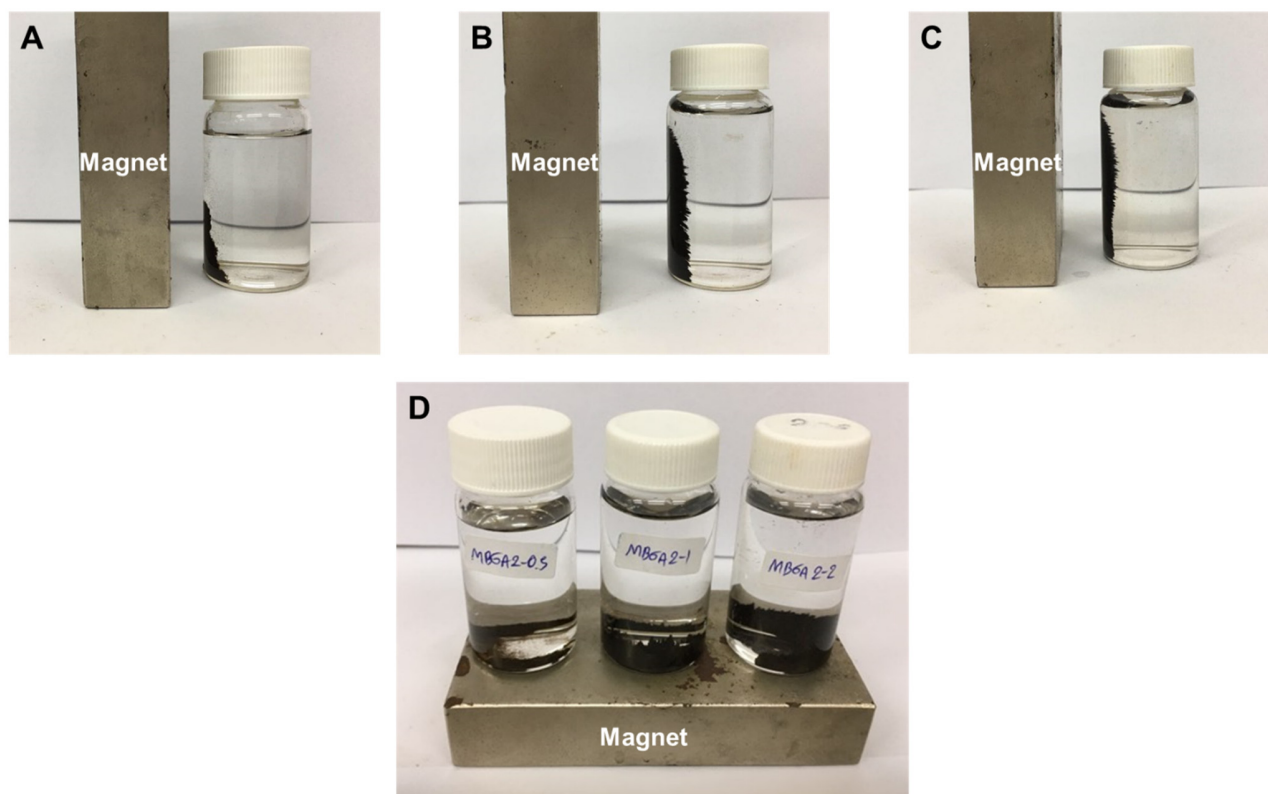

**Figure S3.** Physical image of magnetic separation of (A) MBGA2-0.5 (B) MBGA2-1 (C) MBGA2-2 from aqueous solution and (D)

The magnetic sedimentation for MBGA samples

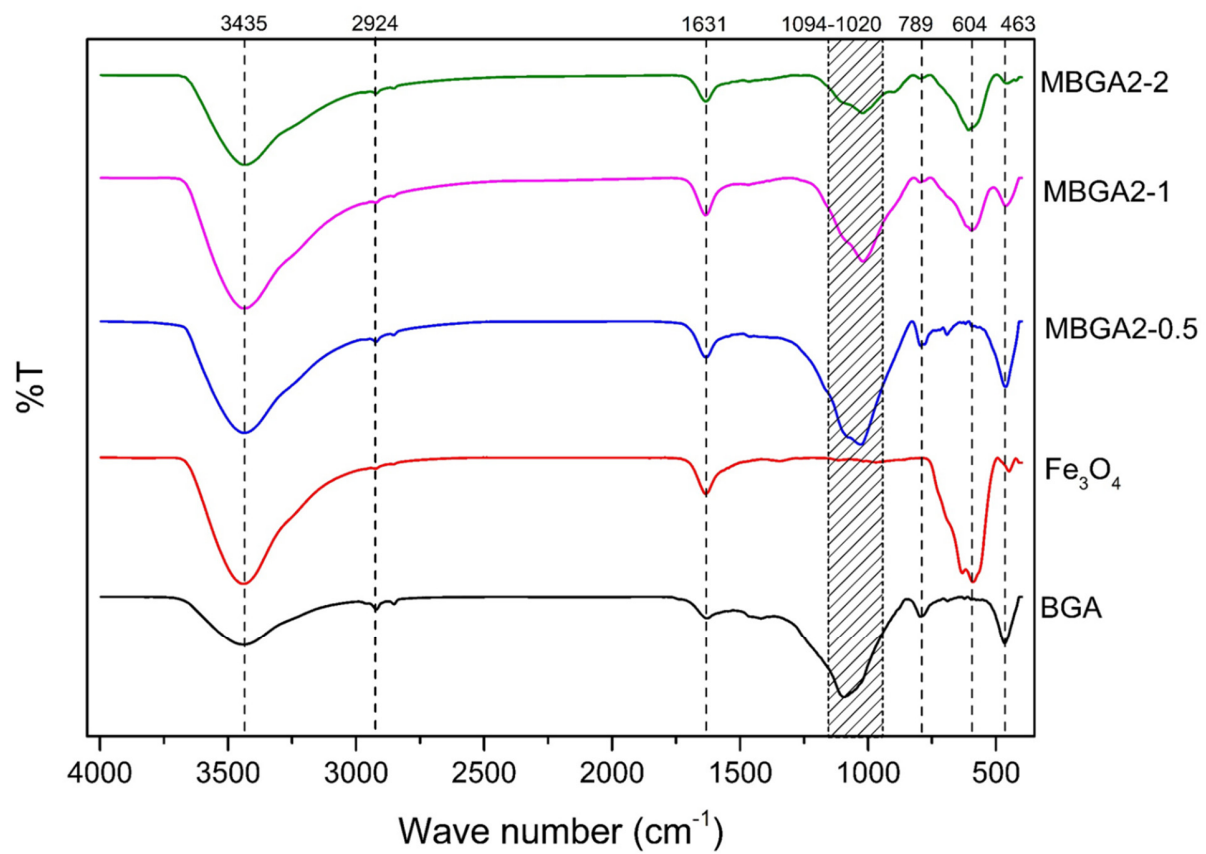

**Figure S4.** FTIR spectra for all samples



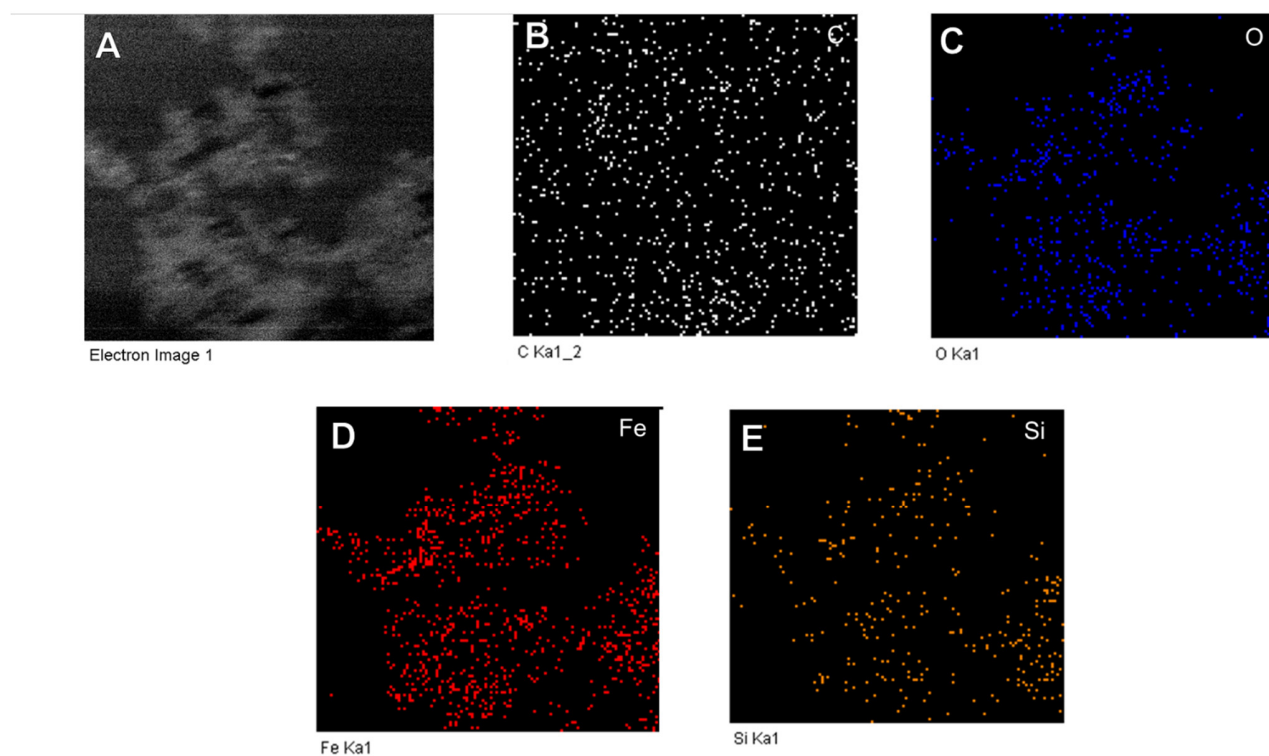

**Figure S5.** (A) TEM image in electron mode (B-E) EDS mapping of C, O, Fe, Si, respectively.

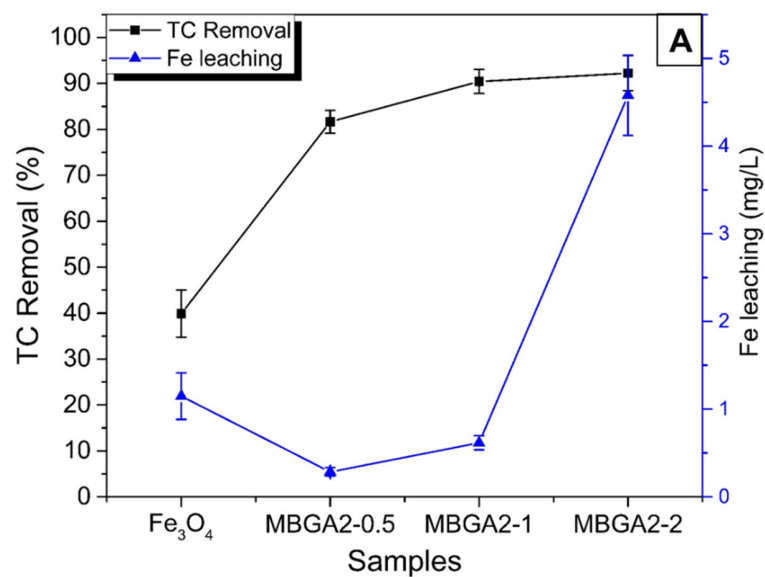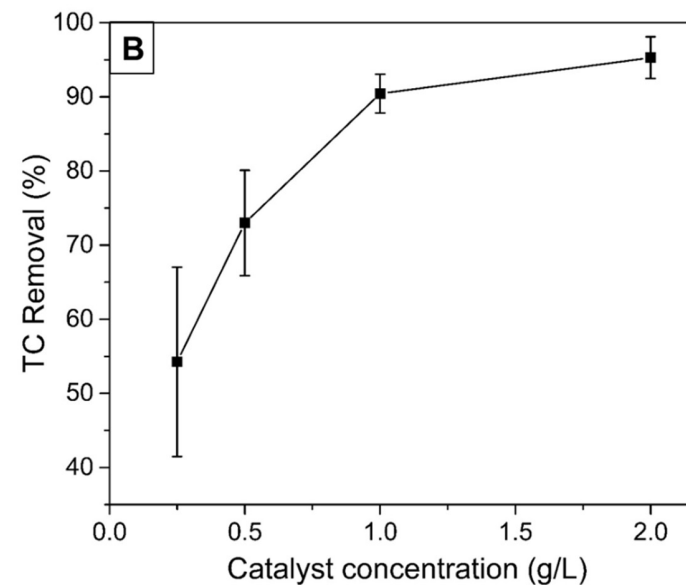

**Figure S6.** (A) Preliminary Catalytic Heterogeneous Fenton Reaction Test with Fe leaching for each samples, (B) The effect of catalyst concentration on the catalytic degradation of TC for MBGA2-1 (conditions:  $C_0 = 800 \text{ mg/L}$ , pH 3.2 (natural),  $\text{H}_2\text{O}_2$  concentration = 5 mM, catalyst concentration = 1 g/L,  $T = 28 \pm 2^\circ\text{C}$ )

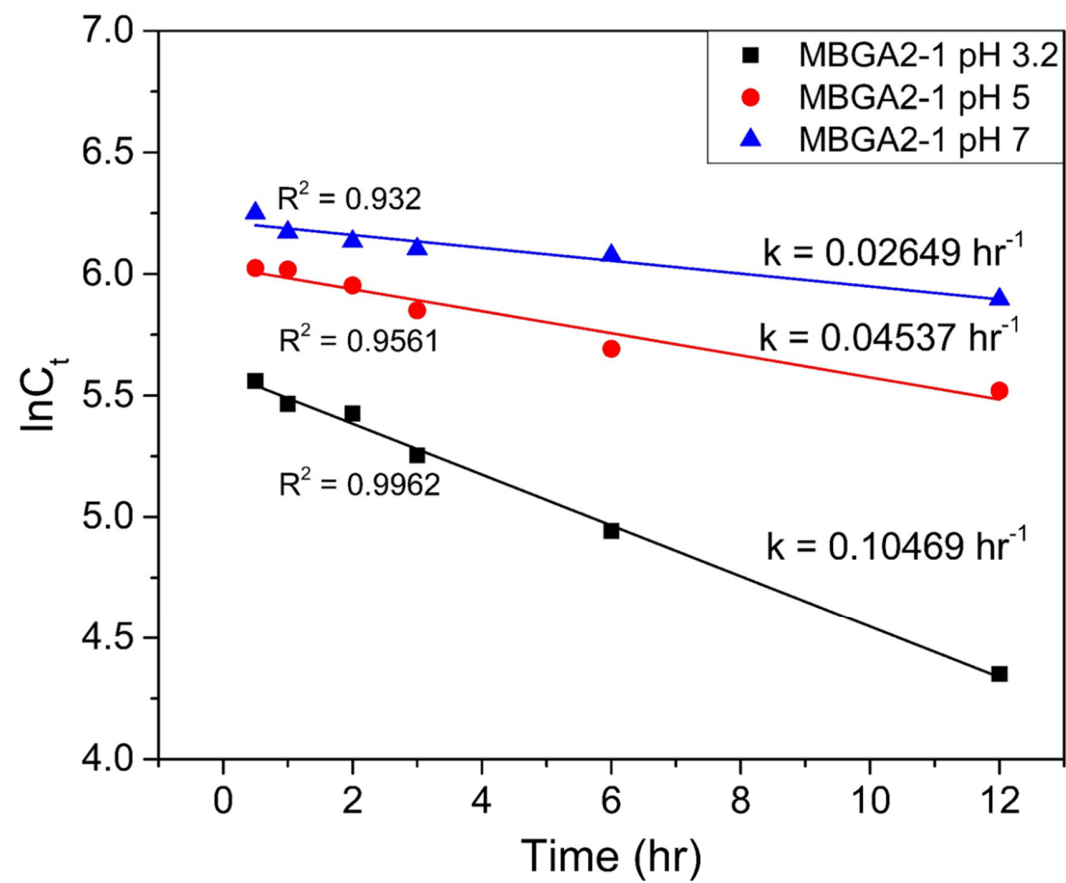

**Figure S7.** Linear pseudo-first-order kinetics model for the catalytic degradation of TC for MBGA2-1 under different pH



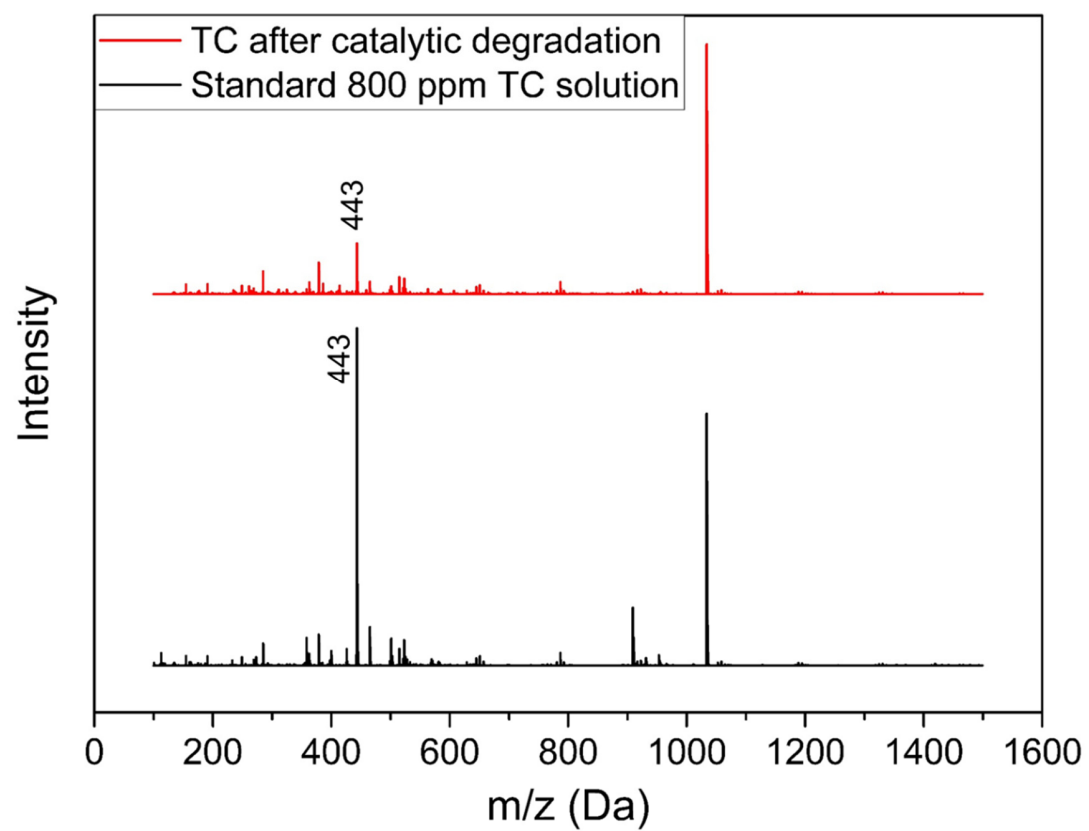

**Figure S8.** LC-MS of the TC solution before- and after- catalytic degradation by MBGA2-1

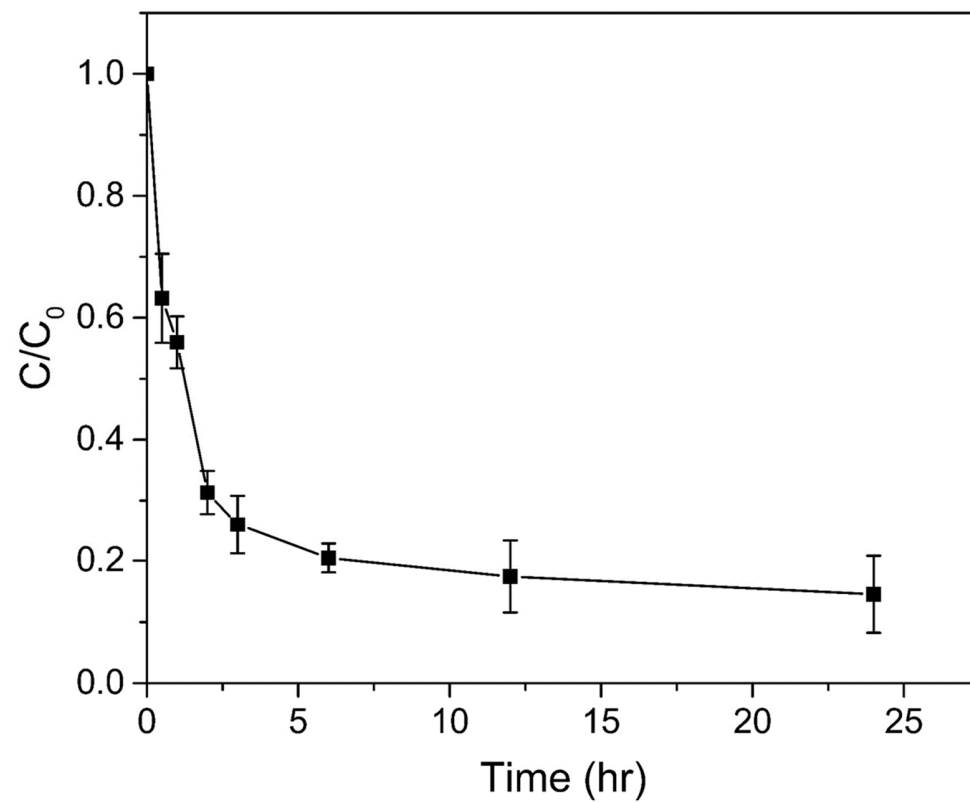

**Figure S9.** Comparative studies of the catalytic degradation of low concentration of TC for MBGA2-1 (conditions:  $C_0 = 40$  mg/L, pH 3.2 (natural),  $H_2O_2$  concentration = 5 mM, catalyst concentration = 1 g/L,  $T = 28 \pm 2^\circ C$ )

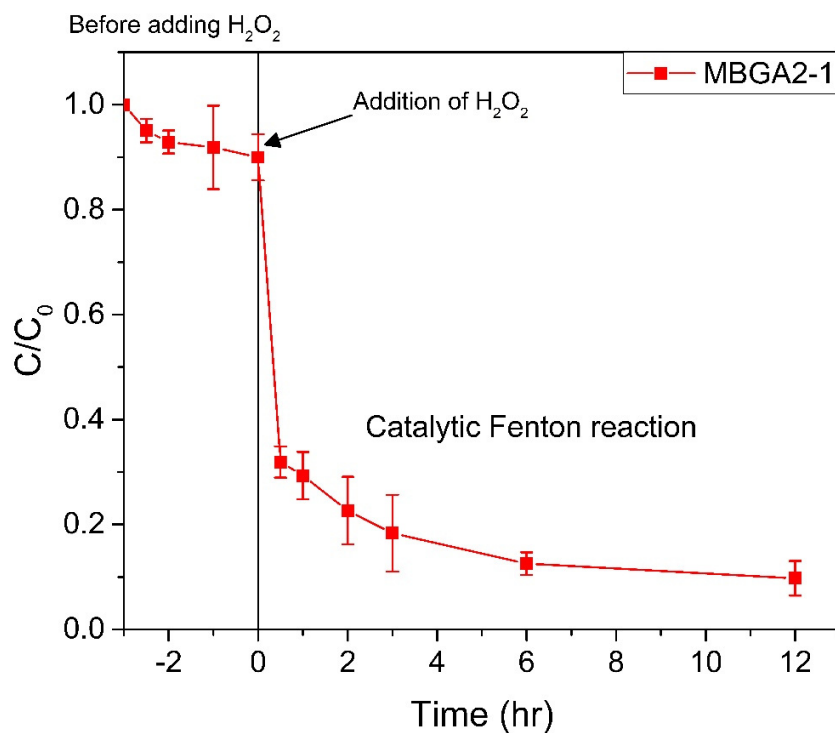

**Figure S10.** The catalytic degradation of TC for MBGA2-1. The Fenton reaction starting by the addition of H<sub>2</sub>O<sub>2</sub> after the adsorption process in dark condition for 3 hr. (conditions:  $C_0 = 800$  mg/L, pH 3.2 (natural), H<sub>2</sub>O<sub>2</sub> concentration = 5 mM, catalyst concentration = 1 g/L,  $T = 28 \pm 2^\circ\text{C}$ )

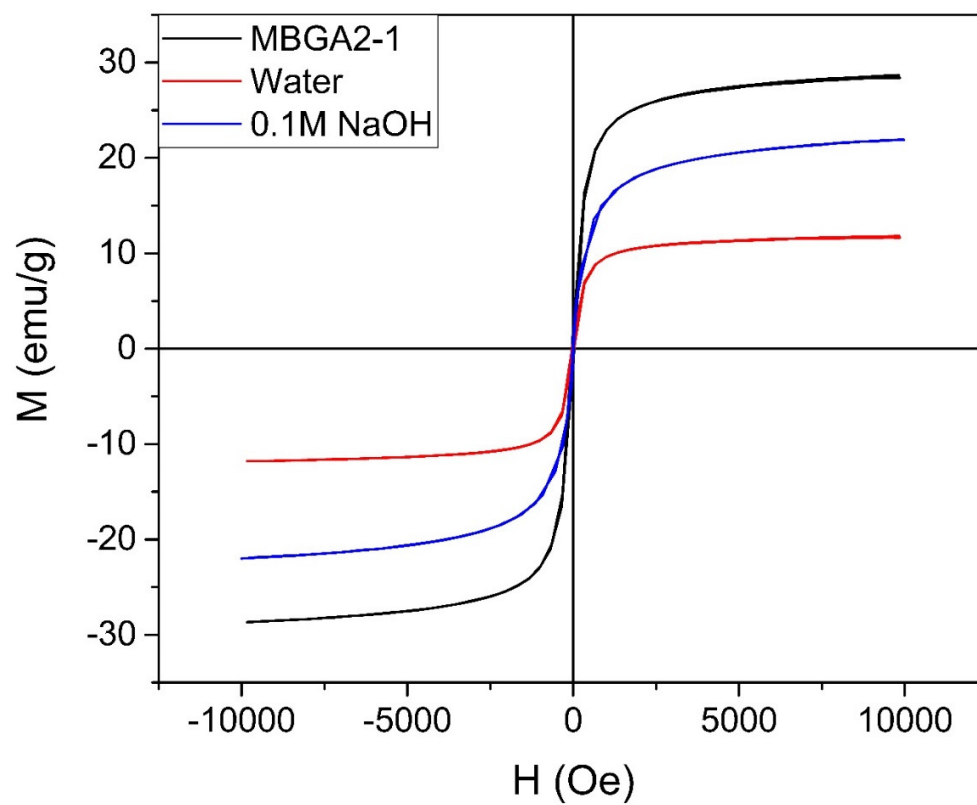

**Figure S11.** VSM hysteresis loop of (black) fresh MBGA2-1, and MBGA2-1 after used 4 cycles by using (red) water and (blue) 0.1M NaOH as eluents.

**Table S1.** The elemental compositions obtained from EDX spectra

| <b>Samples</b> | <b>%C</b> | <b>SD</b> | <b>%O</b> | <b>SD</b> | <b>%Fe</b> | <b>SD</b> | <b>%Si</b> | <b>SD</b> | <b>%Ca</b> | <b>SD</b> | <b>Other</b> | <b>SD</b> |
|----------------|-----------|-----------|-----------|-----------|------------|-----------|------------|-----------|------------|-----------|--------------|-----------|
| BGA            | 60.10     | 15.67     | 24.40     | 9.36      | 1.27       | 0.90      | 7.43       | 4.47      | 1.53       | 0.84      | 5.33         | 1.31      |
| MBGA2-0.5      | 58.87     | 9.95      | 27.13     | 4.14      | 8.97       | 5.22      | 2.70       | 0.36      | 0.63       | 0.21      | 1.73         | 0.25      |
| MBGA2-1        | 24.67     | 7.98      | 26.13     | 9.84      | 40.27      | 4.16      | 3.83       | 1.50      | 0.90       | 0.10      | 4.17         | 1.43      |
| MBGA2-2        | 18.93     | 8.93      | 29.50     | 13.70     | 45.50      | 20.94     | 2.83       | 1.45      | 0.33       | 0.31      | 2.93         | 1.16      |

**Table S2.** Assignment of the peaks in FTIR spectra for all samples

| Wave no.(cm <sup>-1</sup> ) | Assignment            | Structures                                    |
|-----------------------------|-----------------------|-----------------------------------------------|
| 3600-3000                   | Stretching O-H        | Hydroxyl, Carboxylic acid                     |
| 3000-2800                   | Stretching C-H        | Aliphatic, olefinic and aromatic hydrocarbons |
| 1700-1500                   | Stretching C=C or C=O | Olefinic, aromatic hydrocarbons, carbonyl     |
| 1130-1000                   | Stretching Si-O-Si    | Silicon oxide                                 |
| 820-710                     | Stretching Si-C       | Silicon carbide                               |
| 650-550                     | Stretching Fe-O       | Iron Oxide                                    |
| 500-420                     | Bending Si-O-Si       | Silicon oxide                                 |



**Table S3.** Assignment of the peaks in XPS results (C 1s and O 1s) for MBGA2-1

| Peak | MBGA2-1 | %Area | Peak              | Used    | %Area | Peak             |
|------|---------|-------|-------------------|---------|-------|------------------|
|      | BE (eV) |       |                   | MBGA2-1 |       |                  |
| C1s  | 284.53  | 38.2  | Graphitic C       | 284.93  | 52    | Graphitic C      |
|      | 285.52  | 24.6  | sp <sup>3</sup> C | 286.53  | 26.1  | C-O              |
|      | 286.73  | 26.1  | C-O               | 287.5   | 14.3  | C=O              |
|      | 288.61  | 11.1  | O-C=O             | 288.87  | 7.6   | O-C=O            |
| O1s  | 529.96  | 17.2  | Fe-O              | 530.32  | 23.1  | Fe-O             |
|      | 530.95  | 23.7  | C=O               | 531.2   | 25.7  | C-OH/C-O-C       |
|      | 531.89  | 27.3  | C-OH/C-O-C        | 532.12  | 30.5  | C=O              |
|      | 532.85  | 21.5  | SiO <sub>2</sub>  | 533.2   | 17.1  | SiO <sub>2</sub> |
|      | 534.02  | 10.4  | C-O               | 534.37  | 3.6   | C-O              |

**Table S4.** The elemental compositions (in wt%) for all samples, as obtained from XPS results.

| <b>Samples</b>                 | <b>%C</b> | <b>%O</b> | <b>%Fe</b> | <b>%Si</b> | <b>%Ca</b> | <b>%Mg</b> | <b>%K</b> | <b>%Na</b> | <b>%S</b> | <b>%F</b> | <b>%N</b> |
|--------------------------------|-----------|-----------|------------|------------|------------|------------|-----------|------------|-----------|-----------|-----------|
| BGA                            | 37.13     | 35.82     | 0.82       | 17.42      | 3.57       | 2.32       | 2.93      | -          | -         | -         | -         |
| Fe <sub>3</sub> O <sub>4</sub> | 6.78      | 26.30     | 64.54      | -          | -          | -          | -         | 2.39       | -         | -         | -         |
| MBGA2-0.5                      | 11.11     | 35.76     | 35.61      | 13.26      | 2.20       | -          | -         | 2.05       | -         | -         | -         |
| MBGA2-1                        | 13.71     | 34.40     | 39.06      | 8.73       | 0.53       | -          | -         | 3.58       | -         | -         | -         |
| MBGA2-2                        | 12.64     | 27.94     | 48.91      | 7.07       | -          | -          | -         | 3.38       | -         | -         | -         |
| Used MBGA2-1                   | 25.13     | 33.85     | 32.73      | 4.85       | 1.71       | -          | -         | -          | -         | -         | 1.73      |
| MBGA1-1                        | 15.68     | 33.06     | 37.57      | 10.23      | -          | -          | -         | -          | 3.45      | -         | -         |
| MBGA5-1                        | 14.52     | 28.95     | 45.14      | 7.52       | 1.60       | -          | -         | 1.93       | -         | 0.34      | -         |

**Table S5.** Fitted parameters in the Langmuir-Hinshelwood model

| Sample  | Langmuir-Hinshelwood model parameters |                          |
|---------|---------------------------------------|--------------------------|
|         | k (mg/L·s)                            | K <sub>ads</sub> ( L/mg) |
| MBGA2-1 | 836.7224089                           | 0.00066592               |

**Table S6.** Literature curated data on the catalyst for TC removal and results from the current studies.

| Catalyst                                                     | Preparation Method                                | BET (m <sup>2</sup> /g) | M <sub>s</sub> (emu/g) | pH  | H <sub>2</sub> O <sub>2</sub> conc. (mM) | H <sub>2</sub> O <sub>2</sub> amount (mmol) | Catalyst loading (g/L) | T (°C) | C <sub>0</sub> (mg/L) | Estimated Fe loading (g/L) | V (mL) | Reaction                                    | Reaction time (min) | %Removal | Q <sub>e</sub> (mg/g) | k <sub>1</sub> (min <sup>-1</sup> ) | %TOC Removal | Ref.                     |
|--------------------------------------------------------------|---------------------------------------------------|-------------------------|------------------------|-----|------------------------------------------|---------------------------------------------|------------------------|--------|-----------------------|----------------------------|--------|---------------------------------------------|---------------------|----------|-----------------------|-------------------------------------|--------------|--------------------------|
| MnFe <sub>2</sub> O <sub>4</sub> /bio-char composite         | Co-precipitation method                           | 121.45                  | 11.75                  | 5.5 | 100                                      | 10                                          | 0.5                    | 20     | 40                    | -                          | 100    | Photo-Fenton Degradation                    | 120                 | 95       | 76.00                 | -                                   | 37.5         | (Lai et al., 2019)       |
| C-TiO <sub>2</sub> nanocomposites                            | Calcination and acid etching                      | 165.5                   | -                      | -   | -                                        | -                                           | 0.2                    | -      | 10                    | -                          | 50     | Photocatalytic Degradation                  | 160                 | 90.8     | 45.40                 | 0.01258                             | -            | (Ma et al., 2019)        |
| Fe <sub>3</sub> O <sub>4</sub> @MSC                          | Co-precipitation and calcination                  | 120.09                  | 28.71                  | 7   | 10                                       | 2.5                                         | 0.5                    | 23     | 50                    | 0.146                      | 250    | UV-Fenton Degradation                       | 40                  | 99.2     | 99.20                 | -                                   | 72.1         | (Yu et al., 2019)        |
| Fe <sub>3</sub> O <sub>4</sub> @void@TiO <sub>2</sub> sphere | Sol-gel, calcination, and etching method          | 101                     | 28.71                  | 7   | 377                                      | 15.08                                       | 0.25                   | RT     | 40                    | -                          | 40     | UV-Fenton-like Degradation                  | 10                  | 94       | 150.40                | 0.51000                             | 26.9         | (Du et al., 2017)        |
| Fe/N-C composite                                             | Pyrolysis at 900 °C for 2 h                       | -                       | 62                     | 7   | 60                                       | 1.5                                         | 0.2                    | -      | 100                   | -                          | 25     | Ultrasound-assisted Fenton-like Degradation | 80                  | 92.77    | 463.85                | -                                   | 40           | (Yang et al., 2018)      |
| Schorl                                                       | -                                                 | -                       | -                      | 3   | 9.9                                      | 0.99                                        | 10                     | 40     | 100                   | -                          | 100    | Fenton-like Degradation                     | 600                 | 95.2     | 9.52                  | 0.00700                             | 29.8         | (Zhang et al., 2018)     |
| Fe <sub>3</sub> O <sub>4</sub> nanospheres                   | Solvothermal at 200 °C for 10 h                   | 25.4                    | 66.8                   | 7   | 50                                       | 1.5                                         | 0.5                    | 25     | 40                    | 116.36                     | 30     | Fenton-like Degradation                     | 110                 | 82       | 65.60                 | 0.01767                             | 32.9         | (Nie et al., 2020)       |
| NZVI/g-C <sub>3</sub> N <sub>4</sub> @EGC composite          | Calcination and KBH <sub>4</sub> reduction method | 48.41                   | 26.5                   | 5   | -                                        | -                                           | 0.5                    | 30     | 30                    | 0.192                      | 60     | Photo-Fenton Degradation                    | 120                 | 99.5     | 59.70                 | 0.02690                             | -            | (Wang et al., 2019)      |
| Fe-MOFs                                                      | Solvothermal at 110 °C for 20 h                   | 180.41                  | -                      | 4.1 | 98                                       | 9.8                                         | 0.1                    | 14     | 50                    | -                          | 100    | Photo-Fenton Degradation                    | 20                  | 82.52    | 412.60                | 0.07000                             | 48           | (Wu et al., 2020)        |
| Pal@Fe <sub>3</sub> O <sub>4</sub>                           | Co-precipitation method                           | 69.4                    | 44.11                  | 7   | 100                                      | 10                                          | 0.2                    | 30     | 100                   | 1.23                       | 100    | Fenton-like Degradation                     | 60                  | 72.9     | 364.50                | 0.01654                             | -            | (Lian et al., 2019)      |
| Fe <sub>3</sub> O <sub>4</sub> -Cs                           | solvothermal at 200 °C for 24 h                   | 20.57                   | *                      | 3   | 10                                       | 2                                           | 0.5                    | 40     | 48                    | 0.109                      | 200    | Fenton-like Degradation                     | 120                 | 96       | 92.16                 | 0.12700                             | 68.3         | (Li et al., 2020)        |
| SCH/GO nanocomposites                                        | Oxidation-co-precipitation method                 | 208.6                   | -                      | 3.5 | 1                                        | 0.2                                         | 0.25                   | 25     | 15                    | 0.125                      | 200    | Photo-Fenton-like Degradation               | 60                  | 98.3     | 58.98                 | 0.07746                             | 27.3         | (Ma et al., 2020)        |
| yolk-shell ZnFe <sub>2</sub> O <sub>4</sub>                  | Hydrothermal method 180°C for 6 h                 | 83.1                    | *                      | 2   | 20                                       | 2                                           | 0.3                    | 25     | 60                    | 0.152                      | 100    | Photo-Fenton-like Degradation               | 40                  | 94.2     | 188.40                | 0.07000                             | -            | (Xiang et al., 2020)     |
| Fe/S-doped aerogel                                           | Sol-gel and carbonization method                  | 222                     | -                      | 6   | 15                                       | 0.3                                         | 1                      | 25     | 10                    | 0.342                      | 20     | Fenton Degradation                          | 180                 | 99.56    | 9.96                  | -                                   | 45           | (Wang et al., 2020)      |
| FeNi <sub>3</sub> @SiO <sub>2</sub>                          | Co-precipitation method                           | 481.58                  | 69.69                  | 7   | 4.4                                      | 0.88                                        | 0.5                    | 20     | 20                    | -                          | 200    | Fenton-like Degradation                     | 180                 | 87       | 34.80                 | 0.00480                             | -            | (Khodadadi et al., 2019) |
| MBGA catalyst                                                | Co-precipitation method                           | 96                      | 28.71                  | 3.2 | 5                                        | 0.25                                        | 1                      | 28     | 800                   | 0.4                        | 50     | Fenton Degradation                          | 720                 | 90.43    | 721.32                | 0.00170                             | 56.7         | This work                |

\* means that the catalyst was magnetic, but the author does not have the values of saturation magnetization.
